# Supplementary material
Source: MDPI journal article supplement (https://www.mdpi.com/2624-5558/5/1/2)
Supplement: s1 [file s1]

## Supplementary materials

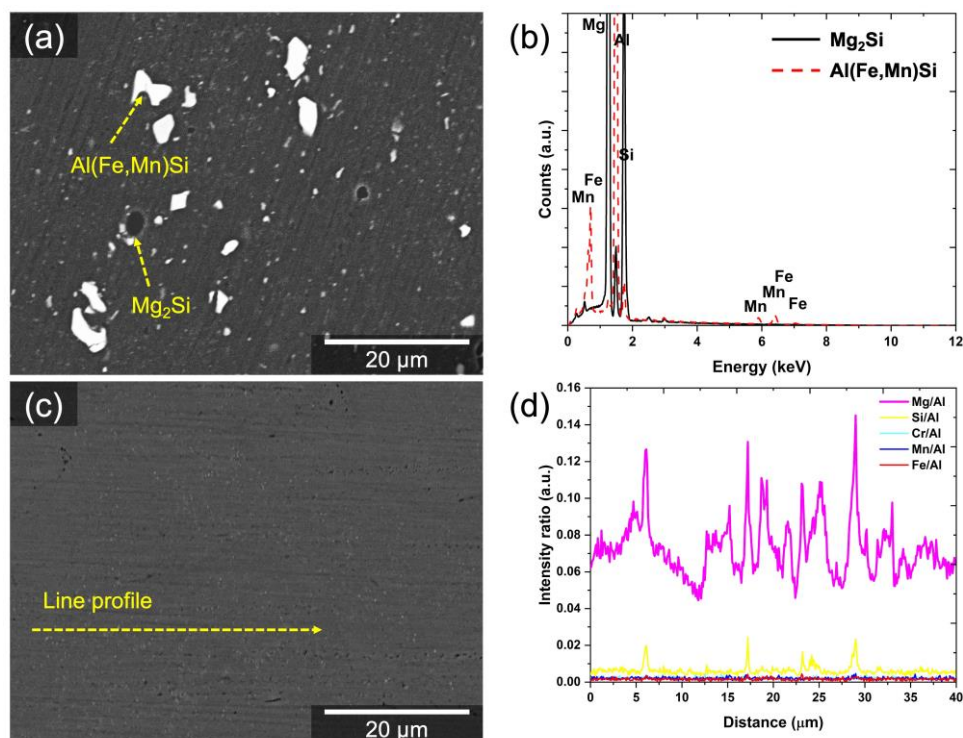

**Figure S1.** BSE micrographs and corresponding point and line profile analyses: (a,b) wrought AA5083-H116 and (c,d) cold sprayed AA5083.

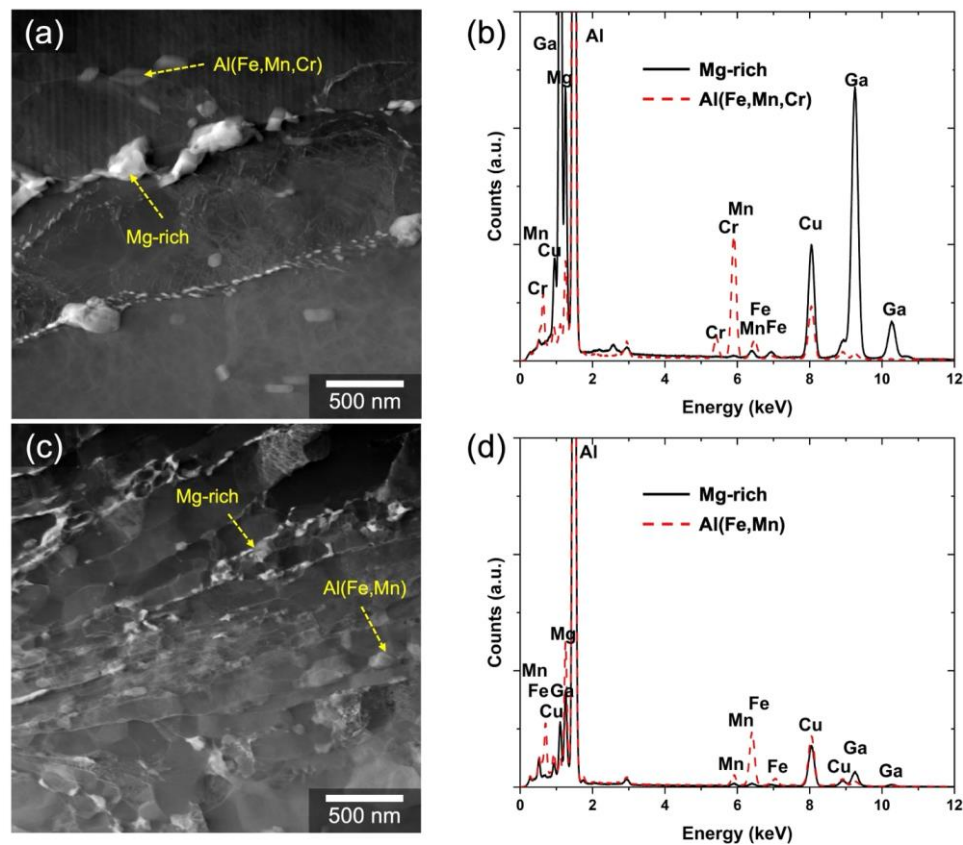

**Figure S2.** STEM micrographs and corresponding point analyses: (a,b) wrought AA5083-H116 and (c,d) cold sprayed AA5083. Note that Cu and Ga peaks come from Cu TEM grid and embedded Ga from the sample preparation step, respectively.
